# Supplementary material for: Association of Selenium Levels with Gestational Diabetes Mellitus: An Updated Systematic Review and Meta-Analysis
Source: MDPI journal article supplement (doi:10.3390/nu14193941), 2022-09-23
Supplement: s1 [file s1]

**Table. S1 Searching strategies for PubMed, Cochrane library, Google Scholar and ScienceDirect**

| <b>PubMed</b>           | <b>Search strategy</b>                                                                                                        |
|-------------------------|-------------------------------------------------------------------------------------------------------------------------------|
| #1                      | Pregnant women [MeSH]                                                                                                         |
| #2                      | Gestation [MeSH]                                                                                                              |
| #3                      | #1 OR #2                                                                                                                      |
| #4                      | Selenium [MeSH]                                                                                                               |
| #5                      | Selenate                                                                                                                      |
| #6                      | Se                                                                                                                            |
| #7                      | #4 OR #5 OR #6                                                                                                                |
| #8                      | Pregnancy-Induced Diabetes [MeSH]                                                                                             |
| #9                      | Gestational Diabetes [MeSH]                                                                                                   |
| #10                     | Gestational Diabetes Mellitus [MeSH]                                                                                          |
| #11                     | Gestational hyperglycaemia                                                                                                    |
| #12                     | GDM                                                                                                                           |
| #13                     | #8 OR #9 OR #10 OR #11 OR #12                                                                                                 |
| #14                     | Normal pregnancy                                                                                                              |
| #15                     | Healthy pregnant                                                                                                              |
| #16                     | Normoglycemic                                                                                                                 |
| #17                     | #14 OR #15 OR #16                                                                                                             |
| #18                     | #3 AND #7 AND #13 AND #17                                                                                                     |
| <b>Cochrane library</b> | <b>Search strategy</b>                                                                                                        |
| #1                      | Pregnancy-Induced Diabetes [ti, ab, kw]                                                                                       |
| #2                      | Gestational Diabetes [ti, ab, kw]                                                                                             |
| #3                      | Gestational Diabetes Mellitus [ti, ab, kw]                                                                                    |
| #4                      | Gestational hyperglycaemia [ti, ab, kw]                                                                                       |
| #5                      | GDM [ti, ab, kw]                                                                                                              |
| #6                      | #1 OR #2 OR #3 OR #4 OR #5                                                                                                    |
| #7                      | Pregnant women [ti, ab, kw]                                                                                                   |
| #8                      | Gestation [ti, ab, kw]                                                                                                        |
| #9                      | #7 OR #8                                                                                                                      |
| #10                     | Selenium [ti, ab, kw]                                                                                                         |
| #11                     | Selenate [ti, ab, kw]                                                                                                         |
| #12                     | Se [ti, ab, kw]                                                                                                               |
| #13                     | #10 OR #11 OR #12                                                                                                             |
| #14                     | Normal pregnant [ti, ab, kw]                                                                                                  |
| #15                     | Healthy pregnant[ti, ab, kw]                                                                                                  |
| #16                     | Normoglycemic [ti, ab, kw]                                                                                                    |
| #17                     | #14 OR #15 OR #16                                                                                                             |
| #18                     | #6 AND #9 AND #13 AND #17                                                                                                     |
| <b>Google Scholar</b>   |                                                                                                                               |
| #1                      | allintitle: selenium “Gestational Diabetes Mellitus” OR “GDM” OR “Gestational hyperglycaemia” OR “Pregnancy-Induced Diabetes” |
| <b>ScienceDirect</b>    |                                                                                                                               |
| #1                      | ((“Gestational Diabetes Mellitus” OR “GDM” OR “Gestational hyperglycaemia” OR “Pregnancy-Induced Diabetes”) AND “selenium”)   |

**Table S2. The Modified Newcastle-Ottawa Scale rating for included studies: (\*,\*\* OR \*\*\* means criteria fulfilled/maximum score =9)**

| <b>Studies</b>                        | <b>Selection</b> | <b>Comparability</b> | <b>Outcome</b> | <b>Total number of stars</b> |
|---------------------------------------|------------------|----------------------|----------------|------------------------------|
| Al-Saleh <i>et al.</i> , 2004 [22]    | **               | ***                  | **             | 7                            |
| Al-Saleh <i>et al.</i> , 2007 [24]    | **               | ***                  | **             | 7                            |
| Bo <i>et al.</i> , 2005 [23]          | ***              | ***                  | **             | 8                            |
| Hamdan <i>et al.</i> , 2014 [25]      | ****             | ***                  | **             | 9                            |
| Kilinc <i>et al.</i> , 2008 [21]      | **               | ***                  | **             | 7                            |
| Lewandowska <i>et al.</i> , 2020 [31] | ***              | ***                  | **             | 8                            |
| Liu <i>et al.</i> , 2020 [29]         | ***              | ***                  | **             | 8                            |
| Molnar <i>et al.</i> , 2008 [26]      | ****             | ***                  | **             | 9                            |
| Moshfeghy <i>et al.</i> , 2020 [41]   | ****             | ***                  | **             | 9                            |
| Onat <i>et al.</i> , 2020 [42]        | ****             | ***                  | **             | 9                            |
| Tan <i>et al.</i> , 2001a [20]        | **               | ***                  | **             | 7                            |
| Tan <i>et al.</i> , 2001b [20]        | **               | ***                  | **             | 7                            |
| Zhu <i>et al.</i> , 2021 [38]         | ****             | ***                  | **             | 9                            |

**Table S3. Sensitivity analysis of the meta-analysis**

| <b>Study omitted</b>                  | <b>SMD</b>    | <b>95% CI</b>          | <b>P-value</b>    | <b>I<sup>2</sup></b> |
|---------------------------------------|---------------|------------------------|-------------------|----------------------|
| <b>None</b>                           | <b>-0.657</b> | <b>[-1.03; -0.279]</b> | <b>&lt;0.0001</b> | <b>93.6%</b>         |
| Al-Saleh <i>et al.</i> , 2004 [22]    | -0.499        | [-0.836; -0.162]       | 0.003             | 92.3%                |
| Al-Saleh <i>et al.</i> , 2007 [24]    | -0.654        | [-1.047; -0.262]       | 0.001             | 94.1%                |
| Bo <i>et al.</i> , 2005 [23]          | -0.722        | [-1.161; -0.284]       | 0.001             | 94.1%                |
| Hamdan <i>et al.</i> , 2014 [25]      | -0.705        | [-1.107; -0.303]       | <0.001            | 94.1%                |
| Kilinc <i>et al.</i> , 2008 [21]      | -0.547        | [-0.912; -0.181]       | 0.003             | 92.7%                |
| Lewandowska <i>et al.</i> , 2020 [31] | -0.751        | [-1.166; -0.336]       | <0.001            | 93.4%                |
| Liu <i>et al.</i> , 2020 [29]         | -0.749        | [-1.157; -0.341]       | <0.001            | 93.6%                |
| Molnar <i>et al.</i> , 2008 [26]      | -0.782        | [-1.163; -0.401]       | <0.001            | 93.6%                |
| Moshfeghy <i>et al.</i> , 2020 [41]   | -0.503        | [-0.858; -0.148]       | 0.005             | 92.4%                |
| Onat <i>et al.</i> , 2020 [42]        | -0.647        | [-1.048; -0.246]       | 0.001             | 93.9%                |
| Tan <i>et al.</i> , 2001a [20]        | -0.643        | [-1.042; -0.244]       | 0.001             | 93.9%                |
| Tan <i>et al.</i> , 2001b [20]        | -0.665        | [-1.071; -0.259]       | 0.001             | 94.0%                |
| Zhu <i>et al.</i> , 2021 [38]         | -0.746        | [-1.206; -0.286]       | 0.001             | 94.1%                |

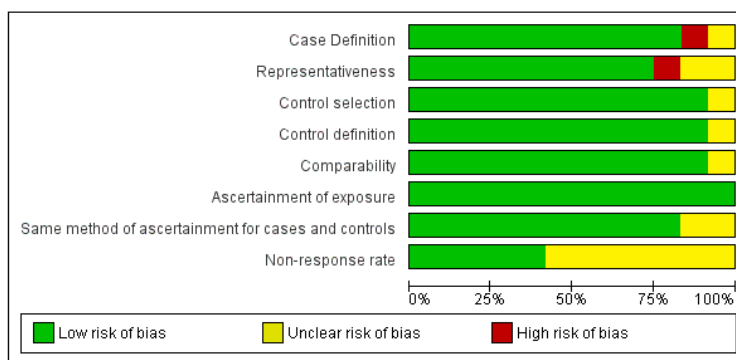

|                          | Case Definition | Representativeness | Control selection | Control definition | Comparability | Ascertainment of exposure | Same method of ascertainment for cases and controls | Non-response rate |
|--------------------------|-----------------|--------------------|-------------------|--------------------|---------------|---------------------------|-----------------------------------------------------|-------------------|
| Al-Saleh et al., 2004    | ●               | ●                  | ●                 | ●                  | ●             | ●                         | ●                                                   | ●                 |
| Al-Saleh et al., 2007    | ●               | ●                  | ●                 | ●                  | ●             | ●                         | ●                                                   | ●                 |
| Bo et al., 2005          | ●               | ●                  | ●                 | ●                  | ●             | ●                         | ●                                                   | ●                 |
| Hamdan et al., 2014      | ●               | ●                  | ●                 | ●                  | ●             | ●                         | ●                                                   | ●                 |
| Kilinc et al., 2008      | ●               | ●                  | ●                 | ●                  | ●             | ●                         | ●                                                   | ●                 |
| Lewandowska et al., 2020 | ●               | ●                  | ●                 | ●                  | ●             | ●                         | ●                                                   | ●                 |
| Liu et al., 2020         | ●               | ●                  | ●                 | ●                  | ●             | ●                         | ●                                                   | ●                 |
| Molnar et al., 2008      | ●               | ●                  | ●                 | ●                  | ●             | ●                         | ●                                                   | ●                 |
| Moshfeghy et al., 2020   | ●               | ●                  | ●                 | ●                  | ●             | ●                         | ●                                                   | ●                 |
| Onat et al., 2020        | ●               | ●                  | ●                 | ●                  | ●             | ●                         | ●                                                   | ●                 |
| Tan et al., 2001         | ●               | ●                  | ●                 | ●                  | ●             | ●                         | ●                                                   | ●                 |
| Zhu et al., 2021         | ●               | ●                  | ●                 | ●                  | ●             | ●                         | ●                                                   | ●                 |

Figure S1: Cochrane collaboration tool for risk of bias assessment[20–26,29,31,38,43–44].

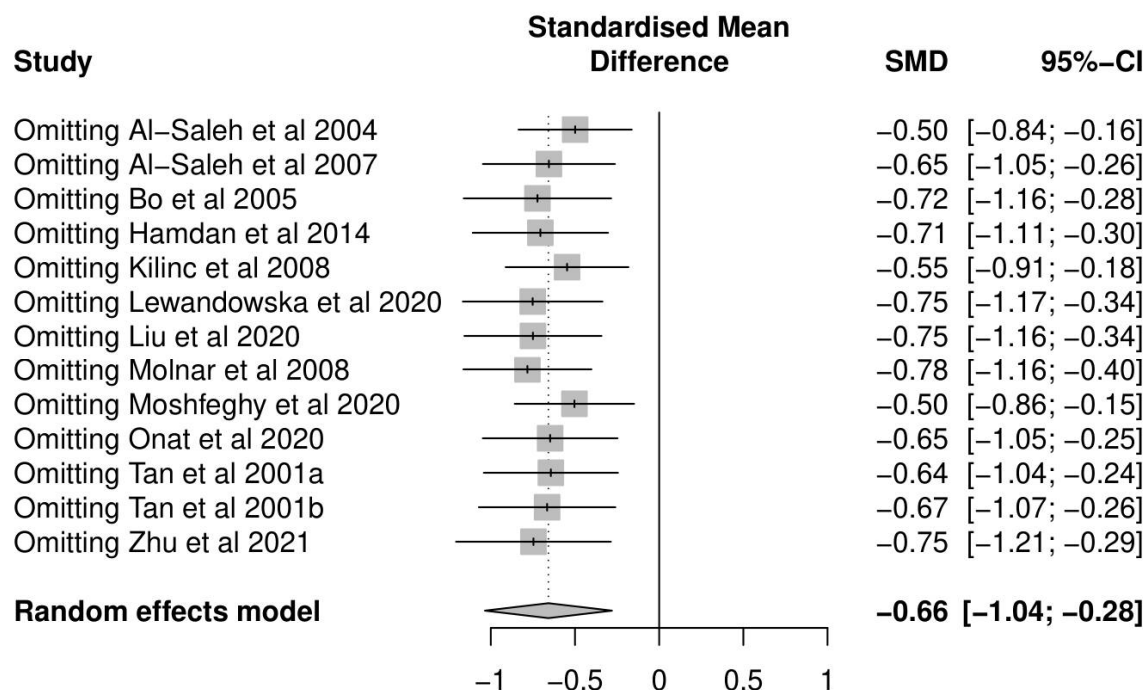

Figure S2: Sensitivity analysis[20–26,29,31,38,43–44].

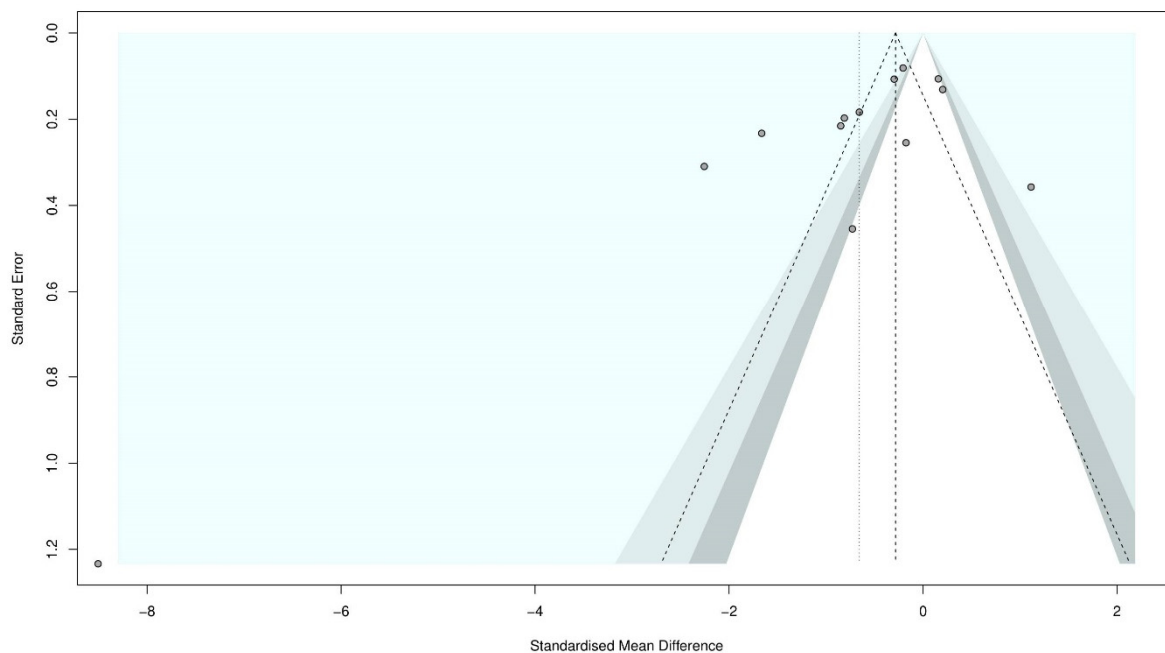

Figure S3: Funnel plot of the reporting bias.

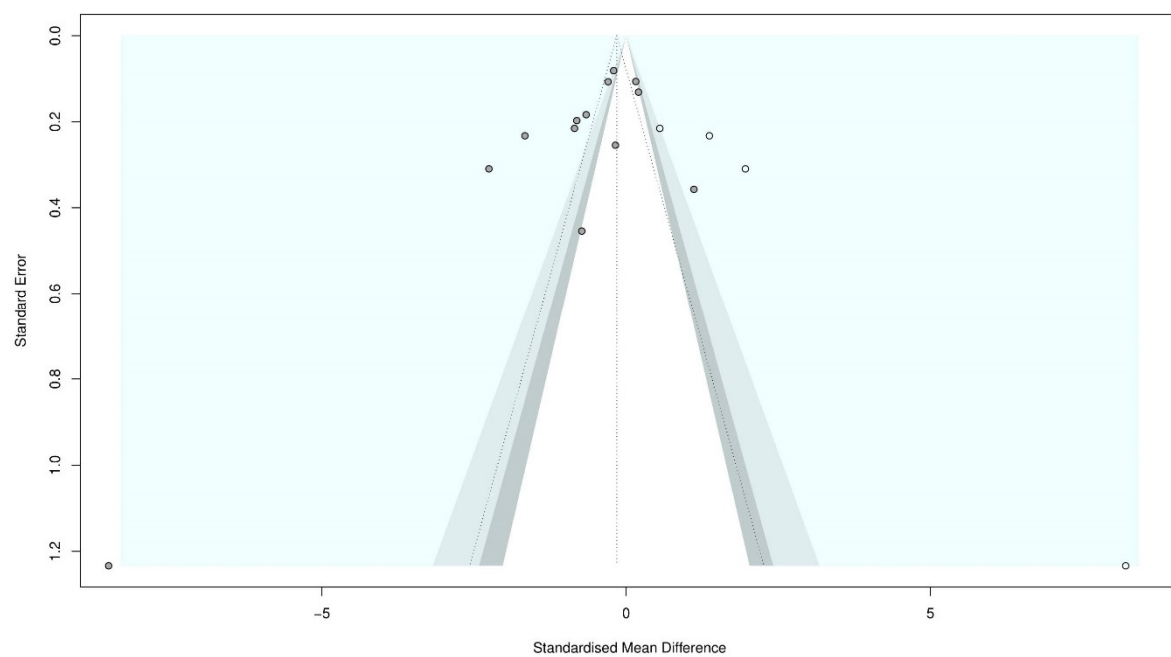

Figure S4: Trim-and-fill graph.
